# Supplementary material
Source: PubMed Central journal article supplement (PMC3381011)
Supplement: ja303498q_si_001.pdf [file ja303498q_si_001.pdf]

# **SUPPORTING INFORMATION**

## **Conformational Basis for Asymmetric Seeding Barrier in Filaments of Three- and Four-Repeat Tau**

**Ayisha Siddiqua<sup>1</sup>, Yin Luo<sup>2</sup>, Virginia Meyer<sup>1</sup>, Michael A. Swanson<sup>1</sup>, Xiang Yu<sup>3</sup>,  
Guanghong Wei<sup>2</sup>, Jie Zheng<sup>3</sup>, Gareth R. Eaton<sup>1</sup>, Buyong Ma<sup>4</sup>, Ruth Nussinov<sup>4,5</sup>, Sandra S.  
Eaton<sup>1</sup>, and Martin Margittai<sup>1\*</sup>**

<sup>1</sup>Department of Chemistry and Biochemistry, University of Denver, Denver, CO 80208

<sup>2</sup>State Key Laboratory of Surface Physics, Key Laboratory for Computational Physical Sciences (MOE), and Department of Physics, Fudan University, Shanghai, P.R.China

<sup>3</sup>Department of Chemical & Biomolecular Engineering, The University of Akron, Akron, Ohio 44325

<sup>4</sup>Basic Research Program, SAIC-Frederick, Inc. Center for Cancer Research Nanobiology Program, Frederick National Laboratory for Cancer Research, NCI, Frederick, Maryland 21702

<sup>5</sup>Sackler Inst. of Molecular Medicine Department of Human Genetics and Molecular Medicine Sackler School of Medicine, Tel Aviv University, Tel Aviv 69978, Israel

\*To whom correspondence should be addressed: Martin Margittai, Department of Chemistry and Biochemistry, University of Denver, 2190 East Iliff Ave, Denver, CO 80208, Tel: (303) 871-4135, FAX: (303) 871-2254, E-mail: martin.margittai@du.edu

**This supplement contains:**

**Additional Experimental Procedures**

**5 Supplementary Figures**

**1 Supplementary Table**

## **ADDITIONAL EXPERIMENTAL PROCEDURES**

**Preparation of Filaments of Fully Spin Labeled Tau.** Double cysteine mutants of K18 and K19 were spin labeled as described above. After mixing 25  $\mu\text{M}$  protein with heparin (at a protein: heparin molar ratio of 4:1) filaments were formed under agitation for 3 days at 25°C. Samples were pelleted at  $100,000 \times g$  for 30 minutes, washed with elution buffer, and transferred into borosilicate capillaries (0.6 mm inner diameter  $\times$  0.84 mm outer diameter).

**CW EPR Measurements.** Continuous wave EPR measurements of fibrils were recorded in a Bruker EMX spectrometer fitted with an ER 4119HS resonator. All spectra had a scan width of 150 G and an incident microwave power of 12 milliwatts. Spectra were normalized to the same number of spins using double integration. From all spectra, a minor background arising from 0.5% soluble tau was subtracted.

**Negative Stain Electron Transmission Microscopy.** Carbon coated copper grids (250-mesh) were placed for 40 s onto 10  $\mu\text{l}$  drops of tau filaments (5  $\mu\text{M}$ ), then for 40 s on 10  $\mu\text{l}$  drops of 2% uranyl acetate and subsequently air dried on filter paper. All images were taken with a Philips/FEI Tecnai-12 electron transmission microscope at 80 keV and equipped with a Gatan CCD camera.

## SUPPLEMENTARY FIGURES

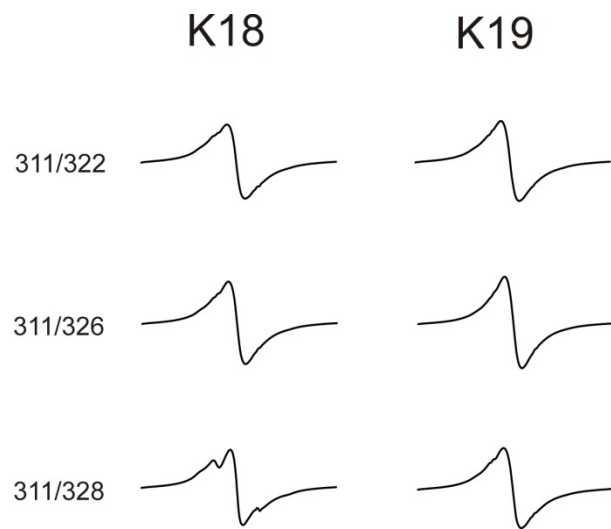

**Figure S1.** Continuous wave EPR spectra of K18 and K19 filaments reveal a stable core with parallel in-register arrangement of  $\beta$ -strands. The MTSL label was attached to cysteines at positions 311/322, 311/326, and 311/328 in R3.

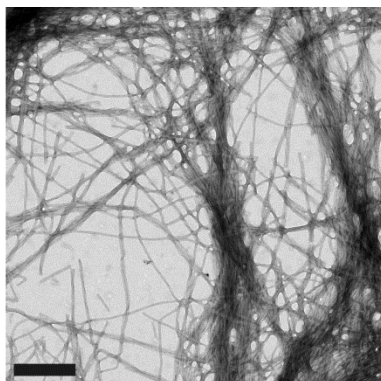

K18 311/322 (K18 seeds)

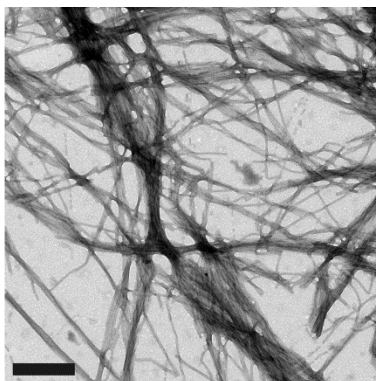

K18 311/326 (K18 seeds)

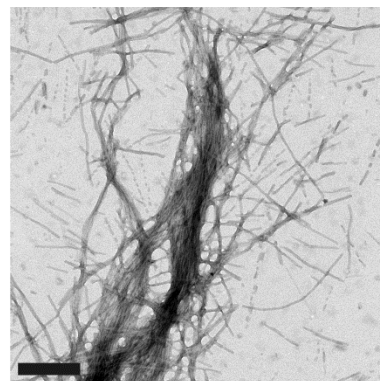

K18 311/328 (K18 seeds)

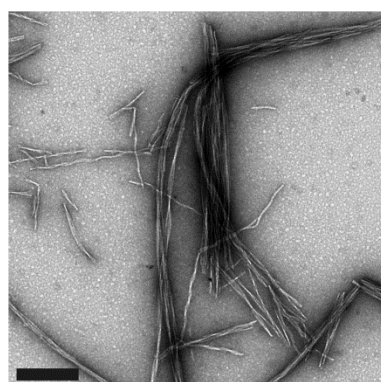

K19 311/322 (K19 seeds)

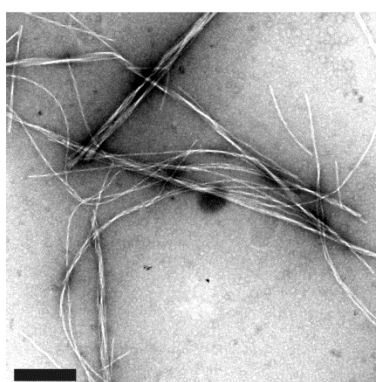

K19 311/326 (K19 seeds)

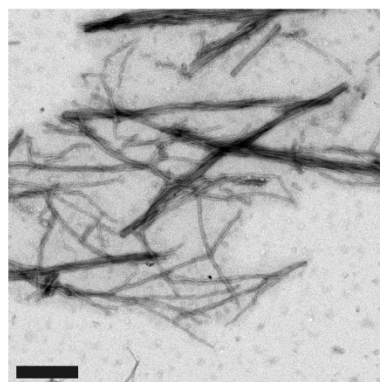

K19 311/328 (K19 seeds)

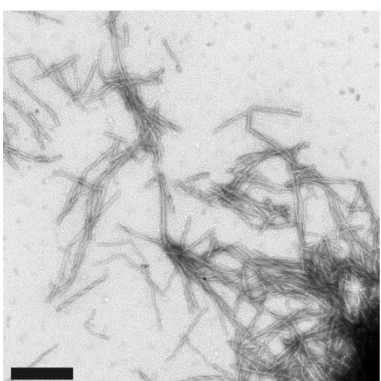

K18 311/322 (K19 seeds)

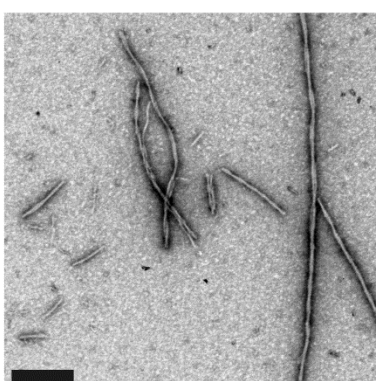

K18 311/326 (K19 seeds)

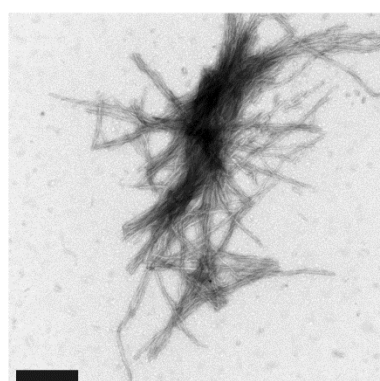

K18 311/328 (K19 seeds)

**Figure S2.** Electron micrographs of doubly spin labeled tau filaments. Filaments (1:50 molar ratio of labeled tau versus wild type tau) were negatively stained with uranyl acetate. Bar = 400 nm.

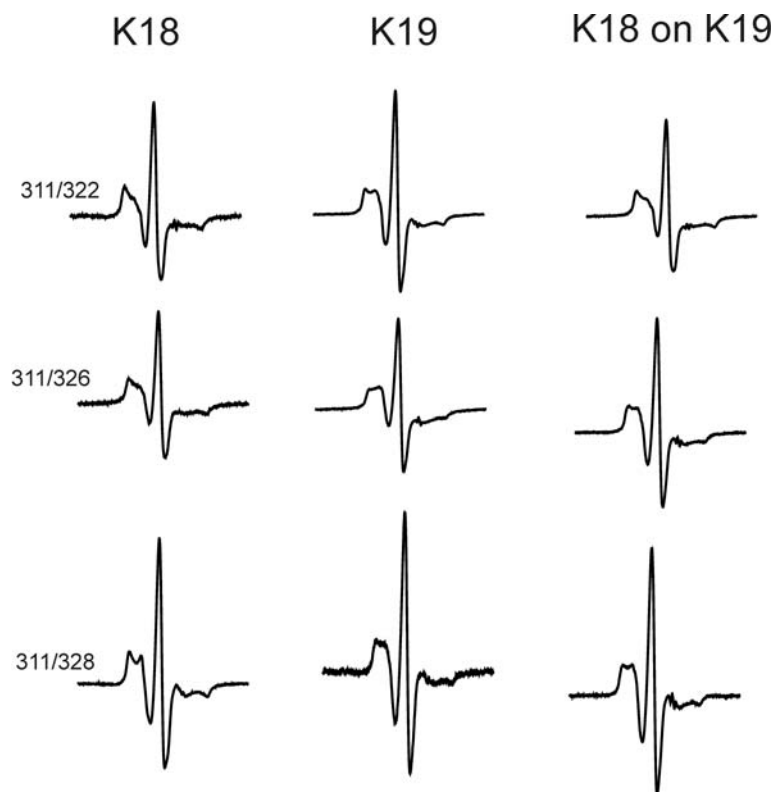

**Figure S3.** Continuous wave EPR spectra of spin diluted tau filaments (1:50 molar ratio of labeled tau versus wild type tau). The absence of spectral broadening indicates that labeled molecules are not preferentially stacked upon themselves.

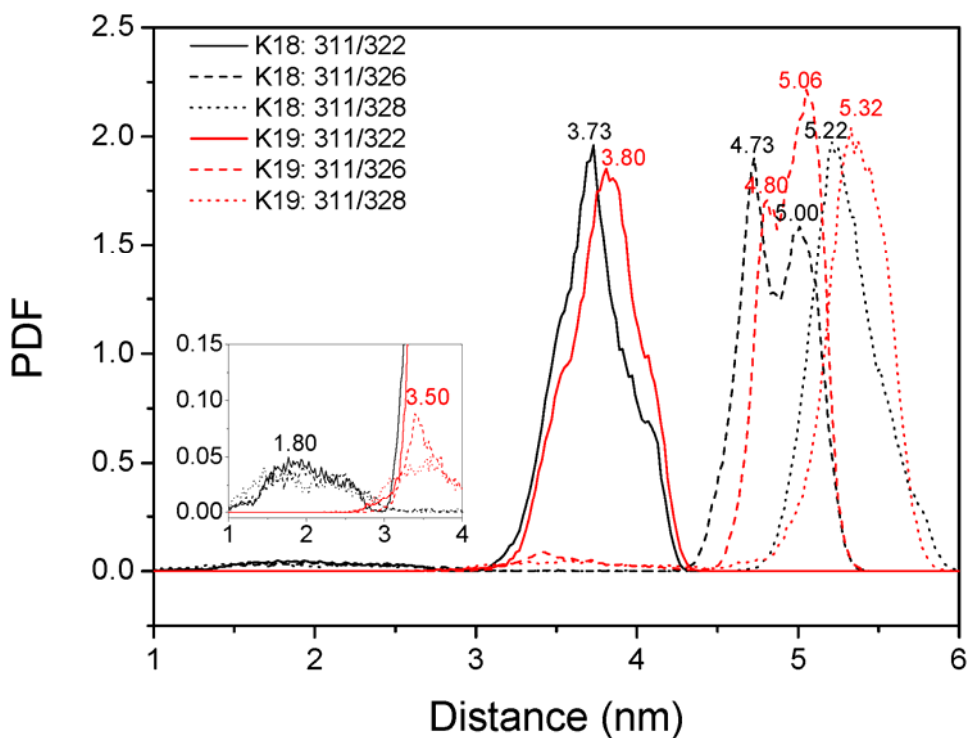

**Figure S4.** Calculated side chain distributions of K18 and K19 filaments in SL-shape. The distances in the theoretical models are between the terminal non-hydrogen atoms in the side-chains: NZ for K311, SG for C322, C $\alpha$  for G326 and CD for I328. The distributions for 311/326 and 311/328 suggest that spin labels attached to these sites are separated by >5 nm and thus too long for characterization by DEER.

L:SL:U=1:6:1

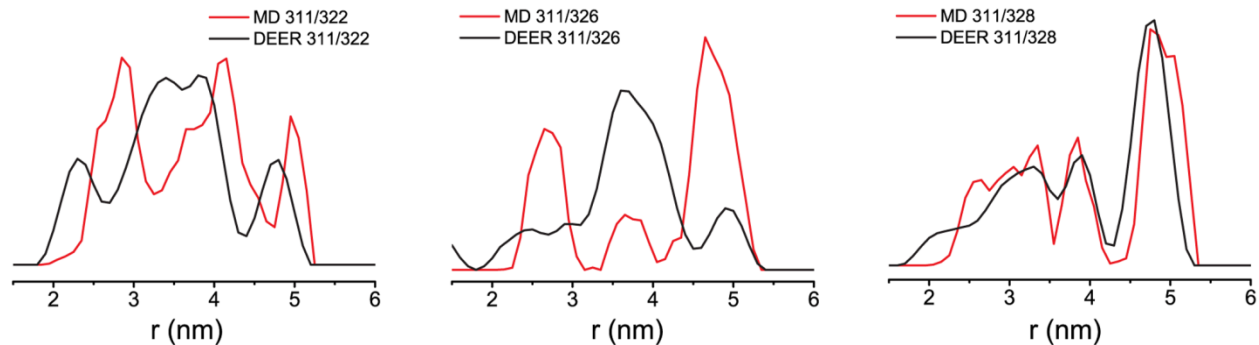

**Figure S5.** DEER distance distributions of 311/322, 311/326, and 311/328 for K18 are compared with rotamer distributions (MD simulations) with a mixture of L, SL, and U conformers at a 1:6:1 ratio. The fitting is optimized to have maximized overlap for 311/328. The less satisfactory fits for 311/322 and 311/326 indicate that the mutants have different preferences in the selection of seeds.

## SUPPLEMENTARY TABLE

|       |         | L-shape | SL-shape | T-shape | 6:3:1 mixture | 1:6:1 mixture |
|-------|---------|---------|----------|---------|---------------|---------------|
| MD-MC | 311/322 | 0.203   | 0.200    | 0.446   | 0.171         | 0.149         |
|       | 311/326 | 0.228   | 0.366    | 0.500   | 0.187         | 0.289         |
|       | 311/328 | 0.248   | 0.294    | 0.340   | 0.169         | 0.111         |
| MMM   | 311/322 | 0.261   | 0.185    | 0.419   | -             | -             |
|       | 311/326 | 0.240   | 0.334    | 0.431   | -             | -             |
|       | 311/328 | 0.293   | 0.307    | 0.359   | -             | -             |

**Table S1.** RMSD of the curve fitting using the MC/MD and MMM methods.
